# Supplementary material for: Yoda1’s energetic footprint on Piezo1 channels and its modulation by voltage and temperature
Source: PubMed Central journal article supplement — Proc Natl Acad Sci U S A. 2022 Jul 11;119(29):e2202269119. doi: 10.1073/pnas.2202269119 (PMC9303978; doi:10.1073/pnas.2202269119), 2022-07-11
Supplement: pnas.2202269119.sapp.pdf [file pnas.2202269119.sapp.pdf]

## **Supplementary Information for**

Yoda1's energetic footprint on Piezo1 channels and its modulation by voltage and temperature.

Tharaka D. Wijerathne, Alper D. Ozkan, and Jérôme J. Lacroix

Jérôme J. Lacroix  
Email: [jlacroix@westernu.edu](mailto:jlacroix@westernu.edu)

### **This PDF file includes:**

Figures S1 to S6  
Tables S1 to S2

## DMSO

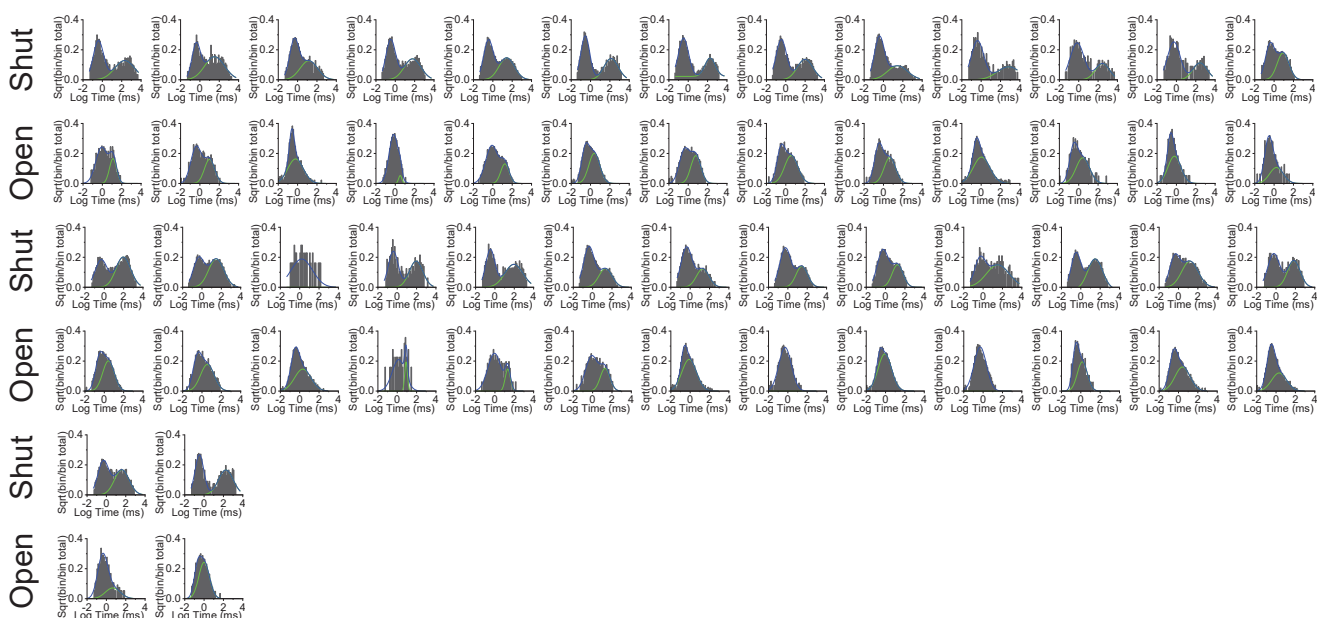

## Yoda1

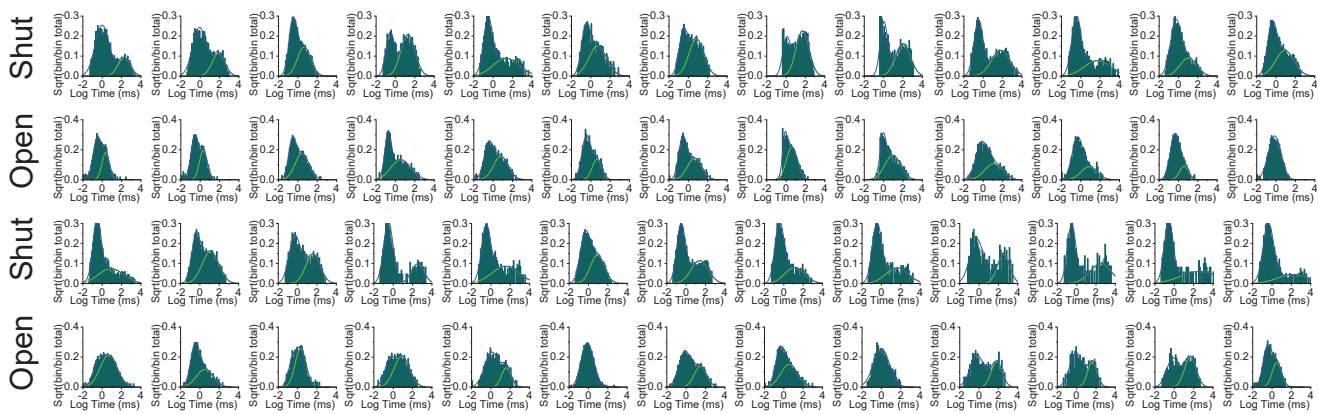

## Dooku1

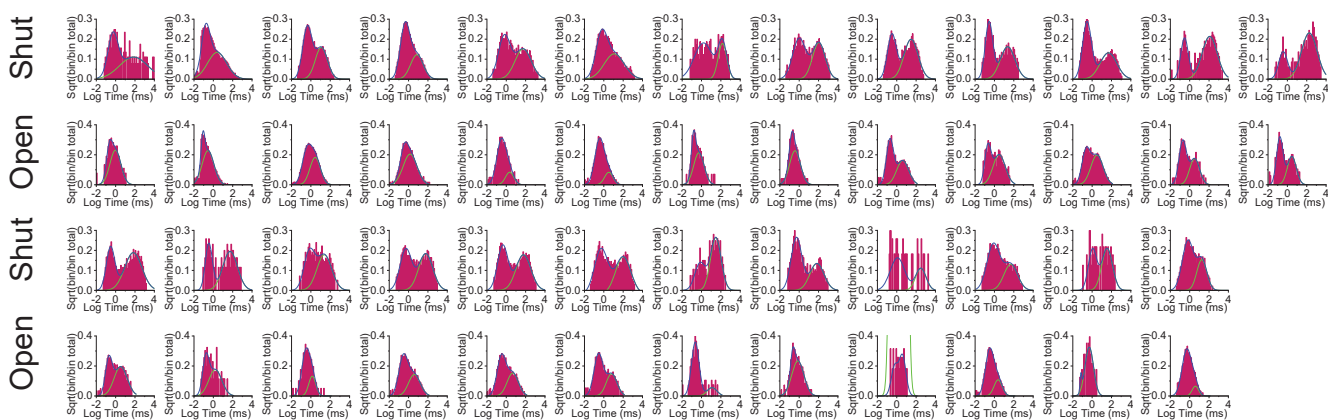

**Fig. S1.** Shut and open dwell time distributions of individual patches measured at 23 °C in the presence of DMSO (grey), Yoda1 (green) and Dooku1 (fuchsia).

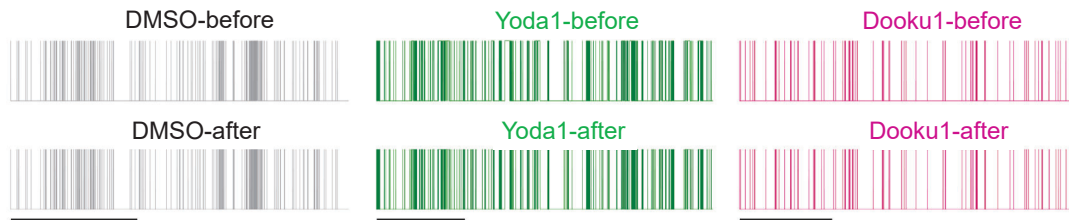

**Fig. S2. Idealized single channel trajectories are not modified by subsequent QuB idealization.** The figure shows exemplar idealized current traces before and after QuB idealization for different treatments. Scale bar = 10 s.

## DMSO

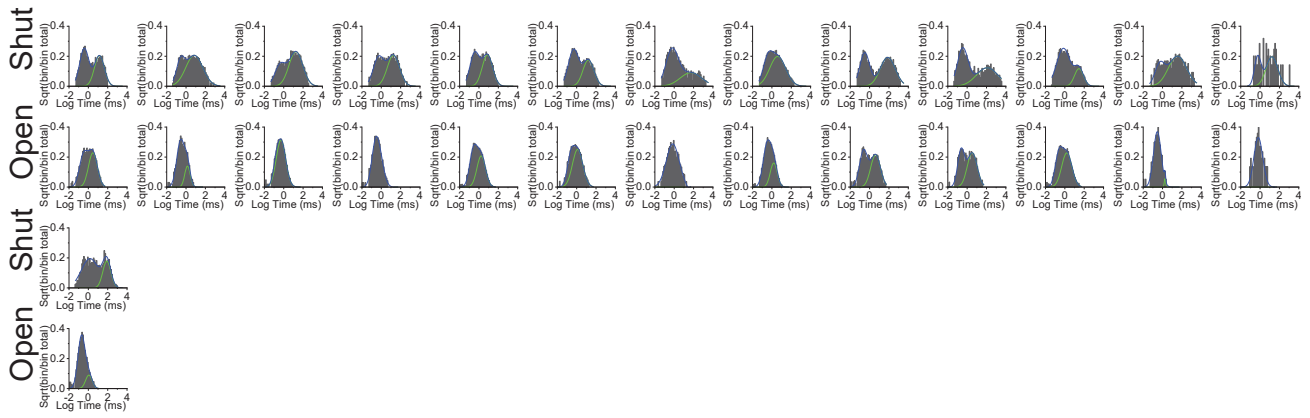

## Yoda1

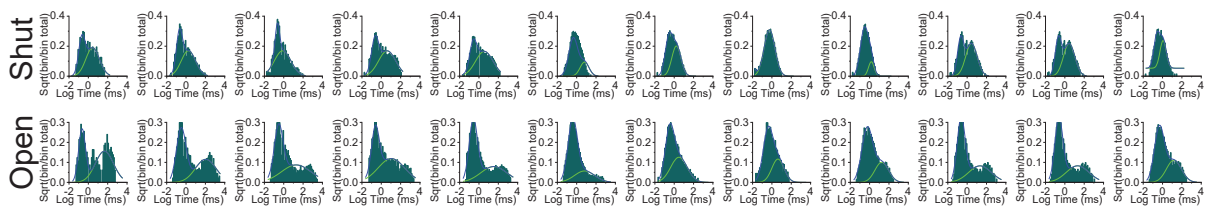

## Dooku1

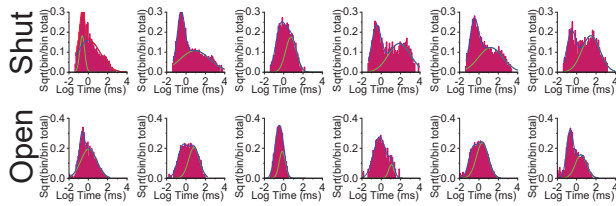

**Fig. S3.** Shut and open dwell time distributions of individual patches measured at 29 °C in the presence of DMSO (grey), Yoda1 (green) and Dooku1 (fuchsia).

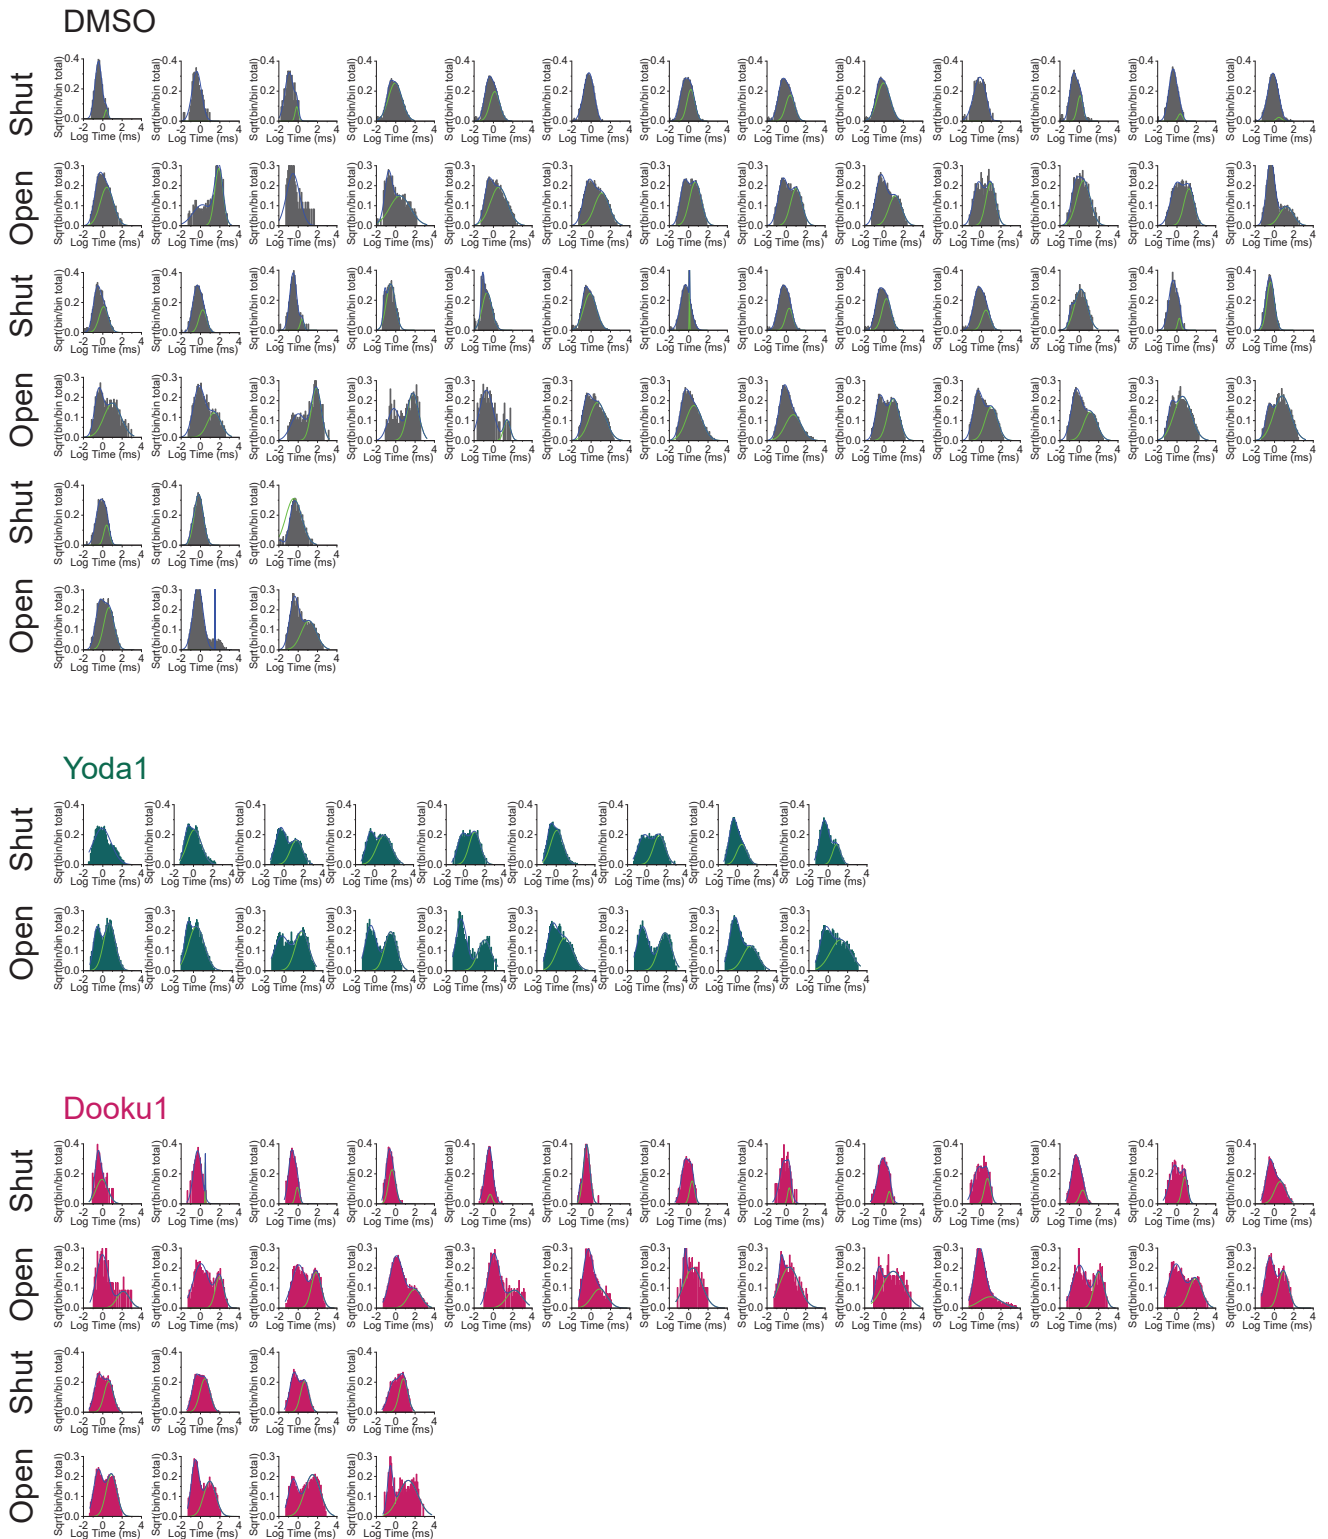

**Fig. S4.** Shut and open dwell time distributions of individual patches measured at 35 °C in the presence of DMSO (grey), Yoda1 (green) and Dooku1 (fuchsia).

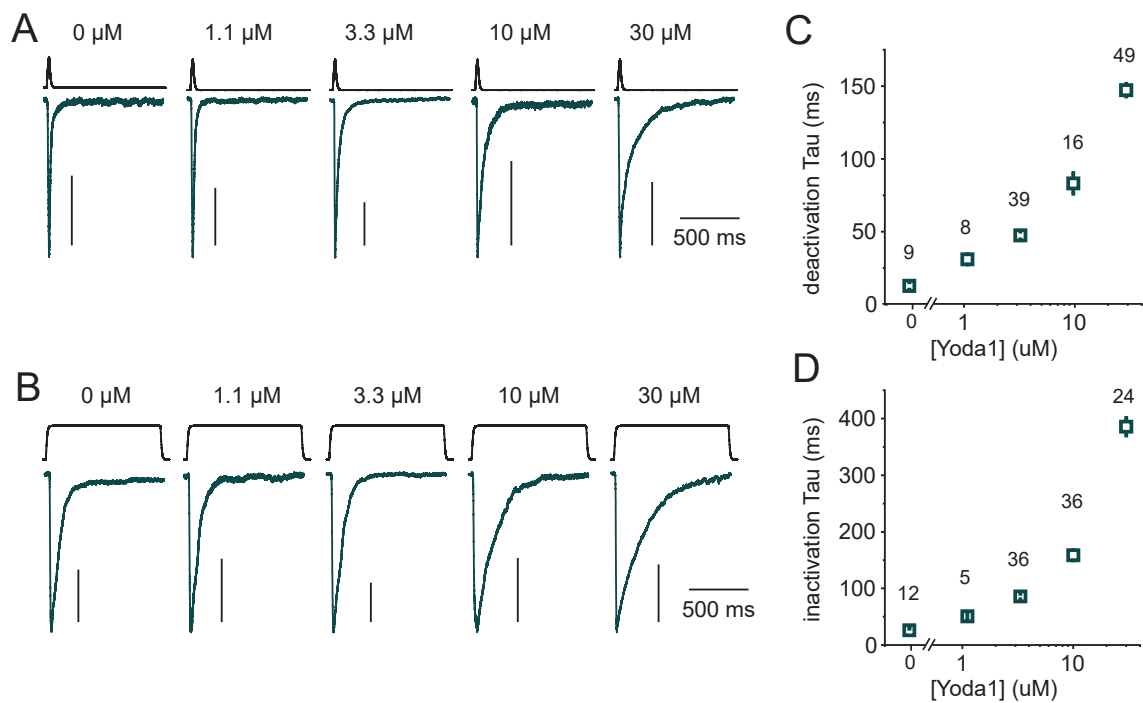

**Fig. S5. Yoda1 slows down Piezo1 inactivation and deactivation in a concentration-dependent manner.** The figure displays representative current traces of Piezo1 relaxation kinetics evoked using 40 ms (**A**) or 1 s (**B**) poking stimuli (3  $\mu\text{m}$ ) and in the presence of the indicated bath concentration of Yoda1 ( $V = -90$  mV,  $T = 25$   $^{\circ}\text{C}$ , vertical scale bar = 400 pA). DMSO was added in each condition to maintain [DMSO] = 0.075% in all experimental conditions. The time constant of deactivation (**C**) and inactivation (**D**) are plotted as a function of Yoda1 concentration. Numbers above plots indicate n values. Error bars = s.e.m.

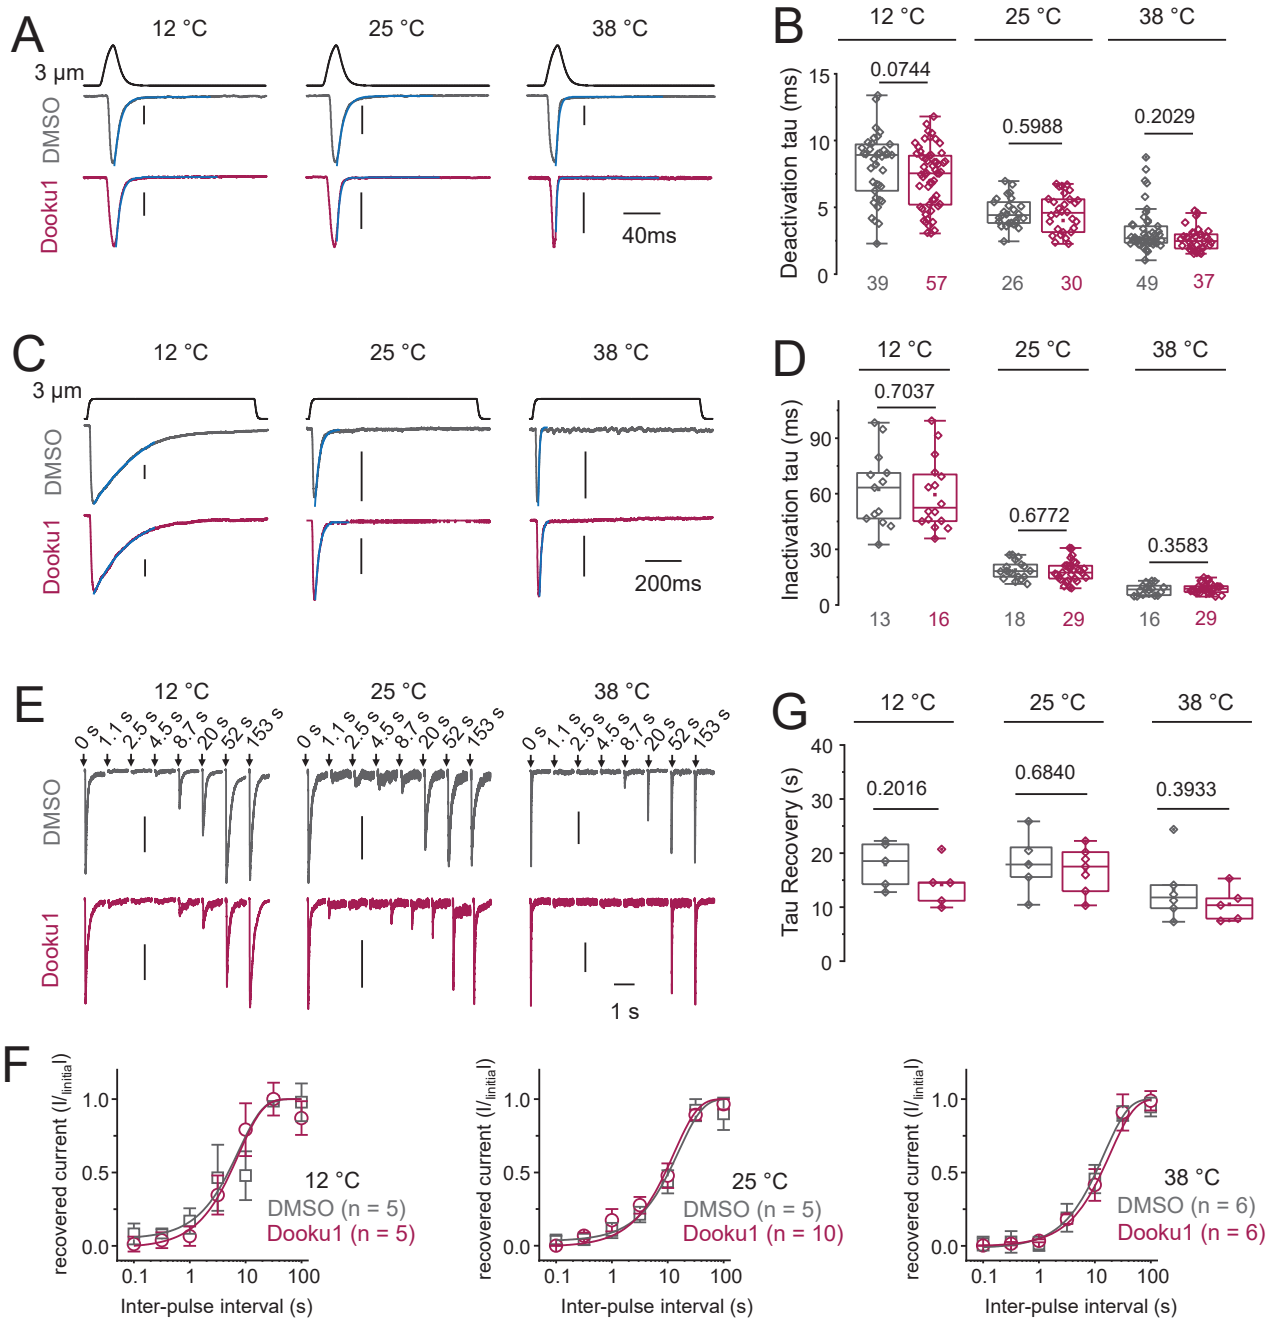

**Fig. S6. Dooku1 does not appreciably modulate macroscopic Piezo1 currents kinetics.** (A) Representative relaxation Piezo1 current traces evoked using 40 ms poking stimuli (3  $\mu$ m) in the presence of 30  $\mu$ M Dooku1 (fuchsia) or 0.3% DMSO control (grey) at the indicated temperature ( $V = -90$  mV). (B) Scatter plots showing deactivation time-constant values obtained by exponential fit (blue lines) of individual traces shown in (A). Numbers underneath plots indicate n values. (C) Representative relaxation Piezo1 current traces obtained as in (A) but using 1 s long poking stimuli instead of 40 ms. (D) Scatter plots showing inactivation time-constant values obtained by exponential fit (blue lines) of individual traces shown in (C). Numbers underneath plots indicate n values. (E) Representative relaxation Piezo1 current traces evoked by repetitive 1 s poking stimuli obtained at the indicated time relative to the first stimulus and in the presence of 30  $\mu$ M Dooku1 or DMSO control ( $V = -90$  mV). (F) The relative fraction of recovered peak current from data shown in (E) is plotted as a function of the inter-pulse time interval for each experimental condition. Lines are exponential fit from aggregated data. (G) Scatter plots of individually fitted time-constants from data shown in (E). In panels B, D, F, and G: error bars = s.e.m. In panels A, C, and E: vertical scale bars = 300 pA. In panels B, D, and G: numbers indicate exact p-values from Students' T-tests.

**Table S1.** Microscopic rate constant parameters fitted using the unconstrained Markov model in QuB.

| transitions | DMSO                                          | Yoda1                                         | Dooku1                                        |
|-------------|-----------------------------------------------|-----------------------------------------------|-----------------------------------------------|
| S1→S2       | $2.1 \times 10^{-5} \pm 3.1 \times 10^{-9}$   | $1.7 \times 10^{-5} \pm 2.7 \times 10^{-3}$   | $2.6 \times 10^{-10} \pm 6.4 \times 10^{-21}$ |
| S2→S1       | $1.3 \times 10^{-3} \pm 7.3 \times 10^{-7}$   | $4.3 \times 10^{-7} \pm 1.6 \times 10^{-3}$   | $7.4 \times 10^{-7} \pm 2.5 \times 10^{-21}$  |
| S1→O1       | $839.7 \pm 0.1$                               | $963.2 \pm 0.036$                             | $665 \pm 1.3 \times 10^{-6}$                  |
| O1→S1       | $1279 \pm 0.01$                               | $994.1 \pm 0.069$                             | $1498 \pm 2.0 \times 10^{-7}$                 |
| S1→O2       | $75.1 \pm 0.04$                               | $74.3 \pm 2.3 \times 10^{-3}$                 | $49.7 \pm 1.3 \times 10^{-7}$                 |
| O2→S1       | $55.4 \pm 0.02$                               | $16.3 \pm 6.2 \times 10^{-4}$                 | $95.4 \pm 1.8 \times 10^{-6}$                 |
| S2→O1       | $7.8 \pm 0.001$                               | $7.3 \pm 8.1 \times 10^{-6}$                  | $5.1 \pm 4.7 \times 10^{-10}$                 |
| O1→S2       | $285.1 \pm 0.1$                               | $151.6 \pm 1.1 \times 10^{-2}$                | $162.4 \pm 7.9 \times 10^{-9}$                |
| S2→O2       | $9.6 \times 10^{-14} \pm 1.4 \times 10^{-17}$ | $1.2 \times 10^{-13} \pm 7.2 \times 10^{-11}$ | $5.8 \times 10^{-7} \pm 6 \times 10^{-10}$    |
| O2→S2       | $1.3 \times 10^{-7} \pm 1.7 \times 10^{-11}$  | $1.2 \times 10^{-7} \pm 2.1 \times 10^{-5}$   | $1.6 \times 10^{-5} \pm 2.1 \times 10^{-10}$  |
| O1→O2       | $2.1 \times 10^{-13} \pm 9.8 \times 10^{-4}$  | $5.9 \times 10^{-13} \pm 3.4 \times 10^{-10}$ | $2.6 \times 10^{-6} \pm 5 \times 10^{-10}$    |
| O2→O1       | $8.7 \times 10^{-4} \pm 4.7 \times 10^{-7}$   | $5.3 \times 10^{-7} \pm 2.3 \times 10^{-3}$   | $3.2 \times 10^{-6} \pm 4.9 \times 10^{-3}$   |

Values are in s<sup>-1</sup>; errors = standard deviations.



**Table S2.** Quality control comparison between Markov-chain models.

| <b>Convergence parameter</b>         | <b>Unconstrained model</b> |          |          | <b>Minimal model</b> |          |          |
|--------------------------------------|----------------------------|----------|----------|----------------------|----------|----------|
|                                      | DMSO                       | Yoda1    | Dooku1   | DMSO                 | Yoda1    | Dooku1   |
| Log-Likelihood                       | 91,824                     | 179,700  | 95,020   | 91,824               | 179,700  | 95,020   |
| Akaike's Information criterion (AIC) | -183,600                   | -359,300 | -190,000 | -183,600             | -359,300 | -190,000 |
| Bayesian Information criterion (BIC) | -183,500                   | -359,200 | -189,900 | -183,600             | -359,200 | -190,000 |
